# Supplementary material for: Organic Anion Transporter Polypeptide 1B1 Polymorphism Modulates the Extent of Drug–Drug Interaction and Associated Biomarker Levels in Healthy Volunteers
Source: PubMed Central journal article supplement — Clin Transl Sci. 2019 Apr 13;12(4):388–99. doi: 10.1111/cts.12625 (PMC6662551; doi:10.1111/cts.12625), 2019-04-13
Supplement: CTS-12-388-s001.pdf [file CTS-12-388-s001.pdf]

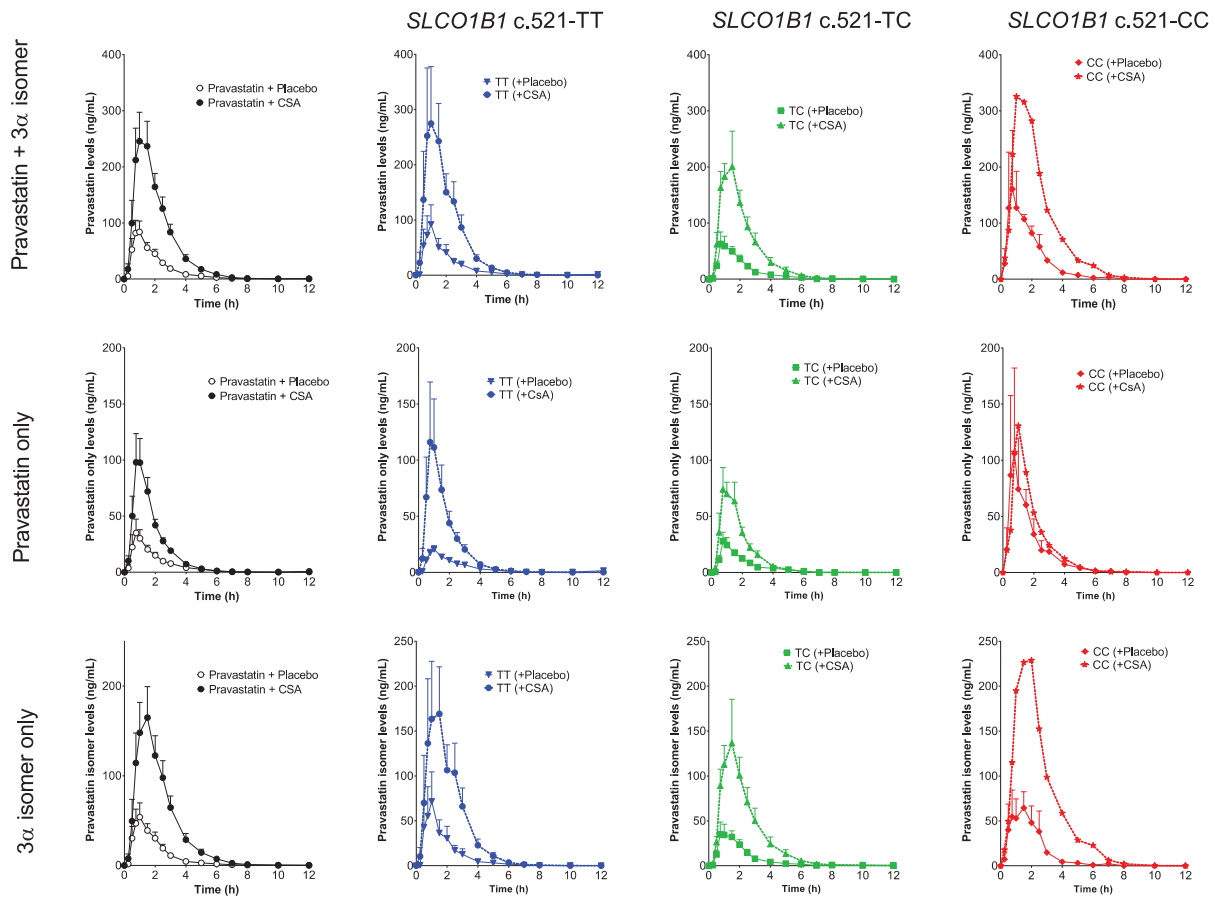

**Figure S1. Concentration time curves of pravastatin and 3 $\alpha$ -hydroxy pravastatin after oral administration of pravastatin and placebo or pravastatin plus cyclosporine (CSA).** The top panel of figures shows levels of pravastatin plus 3 $\alpha$ -hydroxy pravastatin; the middle panel shows levels of pravastatin alone and the bottom panel shows levels of 3 $\alpha$ -hydroxy pravastatin following administration of pravastatin plus placebo and pravastatin plus CSA. Individual figures are presented by genotype group, *SLCO1B1* c.521-TT, *SLCO1B1* c.521-TC and *SLCO1B1* c.521-CC.
