# Supplementary material for: Organic Anion Transporter Polypeptide 1B1 Polymorphism Modulates the Extent of Drug–Drug Interaction and Associated Biomarker Levels in Healthy Volunteers
Source: PubMed Central journal article supplement — Clin Transl Sci. 2019 Apr 13;12(4):388–99. doi: 10.1111/cts.12625 (PMC6662551; doi:10.1111/cts.12625), 2019-04-13
Supplement: CTS-12-388-s003.pdf [file CTS-12-388-s003.pdf]

**Table S1.** Summary of endogenous metabolites, which are substrates of OATP1B1 and have been evaluated as OATP1B1-mediated drug-drug interaction biomarkers. This table summarizes the metabolites and their evidence (i) as substrates of different influx and efflux transporters; (ii) in clinical OATP1B1-mediated drug-drug interactions (human, preclinical studies); (iii) from human genetic studies with OATP1B1-Val174Ala or knockout mice; and (iv) from disease associations.

| Metabolite Class                        | Metabolite and Transporter Substrate and Inhibitor Profile                                                                                             | Fold increase (if available) by OATP1B1 inhibitor                                                                                                                                                                                                                                                                                                                                 | Fold increase by other transporter inhibitor (species)                                               | Human genetic polymorphism; knockout mice; human disease                                                                                                                                                                      | References |
|-----------------------------------------|--------------------------------------------------------------------------------------------------------------------------------------------------------|-----------------------------------------------------------------------------------------------------------------------------------------------------------------------------------------------------------------------------------------------------------------------------------------------------------------------------------------------------------------------------------|------------------------------------------------------------------------------------------------------|-------------------------------------------------------------------------------------------------------------------------------------------------------------------------------------------------------------------------------|------------|
| Porphyrin (arising from heme synthesis) | Coproporphyrin I (CP-I)<br>Substrate: OATP1B1, OATP1B3, MRP2, MRP3<br>Inhibitor: OATP2B1, OCT1, OCT2, OAT1, OAT3, NTCP                                 | <b>Rifampicin:</b> AUC, 4-fold (human)<br><b>Rifampicin:</b> C <sub>max</sub> , 5.7-fold (human)<br><b>Rifampicin:</b> AUC, 2.7-fold (monkey)<br><b>Cyclosporine:</b> AUC, 2.6-fold (monkey)<br><b>Various OATP1B1 inhibitors:</b> AUC 1.4-fold (mild inhibitor), AUC, 2-3-fold (moderate inhibitor) ≥5-fold (strong inhibitor)<br><b>GDC-0810 (weak inhibitor):</b> AUC 1.5-fold | NA                                                                                                   | <b>Mice:</b> Oatp1a/1b(-/-) increased CPs in plasma and urine (>7-fold)<br><b>Human:</b> (this paper)<br><b>Human disease:</b> Dubin Johnson                                                                                  | 1-6        |
| Porphyrin (arising from heme synthesis) | Coproporphyrin III (CP-III)<br>Substrate: OATP1B1, OATP1B3, OATP2B1, MRP2, MRP3<br>Inhibitor: OCT1, OCT2, OAT1, OAT3, NTCP                             | <b>Rifampicin:</b> AUC, 3.3-fold (human)<br><b>Rifampicin:</b> C <sub>max</sub> , 5.4-fold (human)<br><b>Rifampicin:</b> AUC, 3.6-fold (monkey)<br><b>Cyclosporin:</b> AUC, 5.2-fold (monkey)<br><b>Various OATP1B1 inhibitors:</b> AUC, 2-3-fold (moderate inhibitor) ≥5-fold (strong inhibitor)<br><b>GDC-0810 (weak inhibitor):</b> AUC 1.5 fold                               | NA                                                                                                   | No (this paper)<br><b>Human disease:</b> Dubin Johnson                                                                                                                                                                        | 1-4        |
| Heme (degradation product of heme)      | Bilirubin<br>Substrate: OATP1B1, OATP1B3, MRP2<br>Inhibitor: none characterized                                                                        | <b>Rifampicin:</b> AUC increased (rat, human)                                                                                                                                                                                                                                                                                                                                     | NA                                                                                                   | <b>Mice:</b> Oatp1a/1b(-/-) increased total bilirubin and bilirubin glucuronides in plasma and/or urine<br><b>Human:</b> Yes<br><b>Human disease:</b> Rotor syndrome, a rare, benign hereditary conjugated hyperbilirubinemia | 7-12       |
| Dicarboxylic acid                       | Tetradecanedioic acid (TDA)<br>Substrate: OATP1B1, OAT1, OAT3<br>Not substrate of: OATP1B3, OATP2B1, NTCP.<br>Not inhibitor of: P-gp, MRP2, BCRP, BSEP | <b>Rifampicin:</b> AUC, 3.2-fold (human)<br><b>Rifampicin:</b> C <sub>max</sub> , 2.2-fold (human)<br><b>CSA:</b> 30 min after CSA (GCDCA-G) (human)                                                                                                                                                                                                                              | <b>Probenecid:</b> AUC, 2.8-fold (monkey)<br><b>Probenecid:</b> C <sub>max</sub> , 2.3-fold (monkey) | <b>Human GWAS:</b> Significant with $p < 5 \times 10^{-8}$<br><b>Human disease:</b> Not known                                                                                                                                 | 13-19      |
| Dicarboxylic acid                       | Hexadecanedioic acid (HDA)                                                                                                                             | <b>Rifampicin:</b> AUC, 3.2-fold (human)<br><b>Rifampicin:</b> C <sub>max</sub> , 2.2-fold (human)                                                                                                                                                                                                                                                                                | <b>Probenecid:</b> AUC, 1.9 fold (monkey)                                                            | <b>Human GWAS:</b> Significant with $p < 5 \times 10^{-8}$                                                                                                                                                                    | 13-21      |

|                       |                                                                                                                                                                                                                                                                                                                                                                                                                                                                                                                                                                                                                                                                                                                               |                                                                                                                                                                                                                                                                                            |                                                                                                                     |                                                                                                                                                                                                                               |                          |
|-----------------------|-------------------------------------------------------------------------------------------------------------------------------------------------------------------------------------------------------------------------------------------------------------------------------------------------------------------------------------------------------------------------------------------------------------------------------------------------------------------------------------------------------------------------------------------------------------------------------------------------------------------------------------------------------------------------------------------------------------------------------|--------------------------------------------------------------------------------------------------------------------------------------------------------------------------------------------------------------------------------------------------------------------------------------------|---------------------------------------------------------------------------------------------------------------------|-------------------------------------------------------------------------------------------------------------------------------------------------------------------------------------------------------------------------------|--------------------------|
|                       | <p>Substrate: OATP1B1, OAT1, OAT3<br/> Not substrate of: OATP1B3, OATP2B1, NTCP.<br/> Not inhibitor of: P-gp, MRP2, BCRP, BSEP</p>                                                                                                                                                                                                                                                                                                                                                                                                                                                                                                                                                                                            | <p><b>CSA:</b> 30 min after CSA (GCDCA-G) (human)</p>                                                                                                                                                                                                                                      | <p><b>Probenecid:</b> C<sub>max</sub>, 2.0-fold (n.s) (monkey)</p>                                                  | <p><b>Human disease:</b> Association with blood pressure</p>                                                                                                                                                                  |                          |
| Bile acid glucuronide | <ul style="list-style-type: none"> <li>• Chenodeoxycholate-3-glucuronide (CDCA-3G)</li> <li>• Chenodeoxycholate-24-glucuronide (CDCA-24G)</li> <li>• Glycochenodeoxycholate glucuronide (GCDCA-G)</li> </ul> <p>Substrate: OATP1B1, OATP1B3, NTCP, MRP2, MRP3, OAT3<br/> Inhibitor: none characterized</p>                                                                                                                                                                                                                                                                                                                                                                                                                    | <p><b>Rifampicin:</b> CDCA-3G and CDCA-24G are not detectable at baseline and increased with rifampicin (human)<br/> <b>CSA:</b> 30 min after CSA (GCDCA-G) (human)</p>                                                                                                                    | <p>NA</p>                                                                                                           | <p><b>Human GWAS (GCDCA-G):</b> Significant with <math>p &lt; 5 \times 10^{-8}</math><br/> <b>Human disease:</b> Not known</p>                                                                                                | <p>8,13,16-18,22-26</p>  |
| Bile acid sulfates    | <ul style="list-style-type: none"> <li>• Cholic acid 3-O-sulfate (CA-S)</li> <li>• Chenodeoxycholic acid 3-O-sulfate (CDCA-S)</li> <li>• Deoxycholic acid 3-O-sulfate (DCA-S)</li> <li>• Glycocholic acid 3-O-sulfate (GCA-S)</li> <li>• Glycochenodeoxycholic acid 3-O-sulfate (GCDCA-S)</li> <li>• Glycolithocholic acid 3-O-sulfate (GLCA-S)</li> <li>• Glycoursodeoxycholic acid 3-O-sulfate (GUDCA-S)</li> <li>• Lithocholic acid 3-O-sulfate (LCA-S)</li> <li>• Taurocholic acid 3-O-sulfate (TCA-S)</li> <li>• Taurochenodeoxycholic acid 3-O-sulfate (TCDCA-S)</li> <li>• Taurodeoxycholic acid 3-O-sulfate (TDCA-S)</li> <li>• Taurolithocholic acid 3-O-sulfate (TLCA-S)</li> <li>• Tauroursodeoxycholic</li> </ul> | <p><b>Rifampicin:</b> AUC, 20.3-fold (GCDCA-S) (human)<br/> <b>Rifampicin:</b> C<sub>max</sub> and AUC, 10-30-fold (LCA-S, GLCA-S, TLCA-S, UDCA-S); 50-100-fold (GCDCA-S, TCDCA-S, DCA-S, GDCA-S, TDCA-S) (monkey)<br/> <b>CSA:</b> 30 min after CSA (GCDCA-S, GDCA-S, TLCA-S) (human)</p> | <p><b>Probenecid:</b> renal clearance reduced (<math>p &lt; 0.05</math>), plasma levels (n.s) (GCDCA-S) (human)</p> | <p><b>Human GWAS (GDCA-S):</b> Significant with <math>p &lt; 5 \times 10^{-8}</math><br/> <b>Human GWAS (TLCA-S, GCDCA-S):</b> Significant with <math>p &lt; 1 \times 10^{-4}</math><br/> <b>Human disease:</b> Not known</p> | <p>13,14,16,17,22-24</p> |

|                       |                                                                                                                                                                                                                                                                                                                                                                                                                                                                                                                                                                                                                                                                                 |                                                                                                                                                                                                                                                                                                                                                                      |    |                                        |                      |
|-----------------------|---------------------------------------------------------------------------------------------------------------------------------------------------------------------------------------------------------------------------------------------------------------------------------------------------------------------------------------------------------------------------------------------------------------------------------------------------------------------------------------------------------------------------------------------------------------------------------------------------------------------------------------------------------------------------------|----------------------------------------------------------------------------------------------------------------------------------------------------------------------------------------------------------------------------------------------------------------------------------------------------------------------------------------------------------------------|----|----------------------------------------|----------------------|
|                       | <p>acid 3-O-sulfate (TUDCA-S)</p> <ul style="list-style-type: none"> <li>• Ursodeoxycholic acid 3-O-sulfate (UDCA-S)</li> </ul> <p>Substrate: OATP1B1, OATP1B3, NTCP, OAT3 (GCDCA-S), BSEP</p> <p>Inhibitor:None characterized</p>                                                                                                                                                                                                                                                                                                                                                                                                                                              |                                                                                                                                                                                                                                                                                                                                                                      |    |                                        |                      |
| Unsulfated bile acids | <ul style="list-style-type: none"> <li>• Cholic acid (CA)</li> <li>• Chenodeoxycholic acid (CDCA)</li> <li>• Deoxycholic acid (DCA)</li> <li>• Glycocholic acid (GCA)</li> <li>• Glycochenodeoxycholic acid (GCDCA)</li> <li>• Glycodeoxycholic acid (GDCA)</li> <li>• Glycoursodeoxycholic acid (GUDCA)</li> <li>• Lithocholic acid (LCA)</li> <li>• Taurocholic acid (TCA)</li> <li>• Taurochenode-oxycholic acid (TCDCA)</li> <li>• Taurodeoxycholic acid (TDCA)</li> <li>• Taurohyodeoxycholic acid/tauroursodeoxycholic acid (THDCA/TUDCA)</li> <li>• Ursodeoxycholic acid/hyodeoxycholic acid (UDCA/HDCA)</li> </ul> <p>Substrate: OATP1B1, OATP1B3, NTCP, OAT3, BSEP</p> | <p><b>Rifampicin:</b> AUC, 2-7-fold (GDCA,TDCA,GCA,GCDCA) (human)</p> <p><b>Rifampicin:</b> AUC, 1.8-5.9-fold (TUDCA, GCA, CA, TCA, GCDCA, GDCA, TCDCA, TDCA, CDCA) (human)</p> <p><b>Rifampicin:</b> C<sub>max</sub> and AUC, 2-5-fold (UDCA, GDCA, TUDCA, CDCA, GCDCA, TCDCA, DCA, GDCA, TDCA) (monkey)</p> <p><b>Rifampicin:</b> AUC (total bile acids) (rat)</p> | NA | <b>Human disease:</b> Not known        | 11,14,16,17,24,27-30 |
| Steroid sulfates      | <ul style="list-style-type: none"> <li>• Dehydroepiandrosterone Sulfate (DHEAS)</li> </ul> <p>Substrate: OATP1B1, OATP1B3, OAT3, MRP3</p>                                                                                                                                                                                                                                                                                                                                                                                                                                                                                                                                       | <p><b>Rifampicin:</b> AUC (not significant) (DHEAS) (human)</p>                                                                                                                                                                                                                                                                                                      | NA | Yes<br><b>Human disease:</b> Not known | 14,16,26,31          |

## REFERENCES

- 1 Bednarczyk, D. & Boisselle, C. Organic anion transporting polypeptide (OATP)-mediated transport of coproporphyrins I and III. *Xenobiotica* **46**, 457-466, doi:10.3109/00498254.2015.1085111 (2016).
- 2 Kunze, A., Ediage, E. N., Dillen, L., Monshouwer, M. & Snoeys, J. Clinical Investigation of Coproporphyrins as Sensitive Biomarkers to Predict Mild to Strong OATP1B-Mediated Drug-Drug Interactions. *Clin Pharmacokinet*, doi:10.1007/s40262-018-0648-3 (2018).
- 3 Lai, Y. *et al.* Coproporphyrins in Plasma and Urine Can Be Appropriate Clinical Biomarkers to Recapitulate Drug-Drug Interactions Mediated by Organic Anion Transporting Polypeptide Inhibition. *J Pharmacol Exp Ther* **358**, 397-404, doi:10.1124/jpet.116.234914 (2016).
- 4 Liu, L. *et al.* Effect of OATP1B1/1B3 Inhibitor GDC-0810 on the Pharmacokinetics of Pravastatin and Coproporphyrin I/III in Healthy Female Subjects. *J Clin Pharmacol*, doi:10.1002/jcph.1261 (2018).
- 5 Shen, H. *et al.* Coproporphyrins I and III as Functional Markers of OATP1B Activity: In Vitro and In Vivo Evaluation in Preclinical Species. *J Pharmacol Exp Ther* **357**, 382-393, doi:10.1124/jpet.116.232066 (2016).
- 6 Shen, H. *et al.* Further Studies to Support the Use of Coproporphyrin I and III as Novel Clinical Biomarkers for Evaluating the Potential for Organic Anion Transporting Polypeptide 1B1 and OATP1B3 Inhibition. *Drug Metab Dispos* **46**, 1075-1082, doi:10.1124/dmd.118.081125 (2018).
- 7 Briz, O., Serrano, M. A., Maclas, R. I., Gonzalez-Gallego, J. & Marin, J. J. Role of organic anion-transporting polypeptides, OATP-A, OATP-C and OATP-8, in the human placenta-maternal liver tandem excretory pathway for foetal bilirubin. *Biochem J* **371**, 897-905, doi:10.1042/BJ20030034 (2003).
- 8 Cui, Y., Konig, J., Leier, I., Buchholz, U. & Keppler, D. Hepatic uptake of bilirubin and its conjugates by the human organic anion transporter SLC21A6. *J Biol Chem* **276**, 9626-9630, doi:10.1074/jbc.M004968200 (2001).
- 9 Kotsampasakou, E., Escher, S. E. & Ecker, G. F. Curated human hyperbilirubinemia data and the respective OATP1B1 and 1B3 inhibition predictions. *Data Brief* **11**, 204-207, doi:10.1016/j.dib.2017.02.009 (2017).
- 10 van de Steeg, E., van Esch, A., Wagenaar, E., Kenworthy, K. E. & Schinkel, A. H. Influence of human OATP1B1, OATP1B3, and OATP1A2 on the pharmacokinetics of methotrexate and paclitaxel in humanized transgenic mice. *Clin Cancer Res* **19**, 821-832, doi:10.1158/1078-0432.CCR-12-2080 (2013).
- 11 Watanabe, T. *et al.* Utility of bilirubins and bile acids as endogenous biomarkers for the inhibition of hepatic transporters. *Drug Metab Dispos* **43**, 459-466, doi:10.1124/dmd.114.061051 (2015).
- 12 Zhang, W. *et al.* OATP1B1 polymorphism is a major determinant of serum bilirubin level but not associated with rifampicin-mediated bilirubin elevation. *Clin Exp Pharmacol Physiol* **34**, 1240-1244, doi:10.1111/j.1440-1681.2007.04798.x (2007).
- 13 Long, T. *et al.* Whole-genome sequencing identifies common-to-rare variants associated with human blood metabolites. *Nat Genet* **49**, 568-578, doi:10.1038/ng.3809 (2017).
- 14 Shen, H. *et al.* Comparative Evaluation of Plasma Bile Acids, Dehydroepiandrosterone Sulfate, Hexadecanedioate, and Tetradecanedioate with Coproporphyrins I and III as Markers of OATP Inhibition in Healthy Subjects. *Drug Metab Dispos* **45**, 908-919, doi:10.1124/dmd.117.075531 (2017).
- 15 Shen, H. *et al.* Discovery and Validation of Pyridoxic Acid and Homovanillic Acid as Novel Endogenous Plasma Biomarkers of Organic Anion Transporter (OAT) 1 and OAT3 in Cynomolgus Monkeys. *Drug Metab Dispos* **46**, 178-188, doi:10.1124/dmd.117.077586 (2018).
- 16 Shin, S. Y. *et al.* An atlas of genetic influences on human blood metabolites. *Nat Genet* **46**, 543-550, doi:10.1038/ng.2982 (2014).
- 17 Yee, S. W. *et al.* Metabolomic and Genome-wide Association Studies Reveal Potential Endogenous Biomarkers for OATP1B1. *Clin Pharmacol Ther* **100**, 524-536, doi:10.1002/cpt.434 (2016).
- 18 Yousri, N. A. *et al.* Whole-exome sequencing identifies common and rare variant metabolic QTLs in a Middle Eastern population. *Nat Commun* **9**, 333, doi:10.1038/s41467-017-01972-9 (2018).

- 19 Yu, B. *et al.* Loss-of-function variants influence the human serum metabolome. *Sci Adv* **2**, e1600800, doi:10.1126/sciadv.1600800 (2016).
- 20 Menni, C. *et al.* Metabolomic identification of a novel pathway of blood pressure regulation involving hexadecanedioate. *Hypertension* **66**, 422-429, doi:10.1161/HYPERTENSIONAHA.115.05544 (2015).
- 21 Menni, C. *et al.* Molecular pathways associated with blood pressure and hexadecanedioate levels. *PLoS One* **12**, e0175479, doi:10.1371/journal.pone.0175479 (2017).
- 22 Suga, T. *et al.* Preference of Conjugated Bile Acids over Unconjugated Bile Acids as Substrates for OATP1B1 and OATP1B3. *PLoS One* **12**, e0169719, doi:10.1371/journal.pone.0169719 (2017).
- 23 Takehara, I. *et al.* Investigation of Glycochenodeoxycholate Sulfate and Chenodeoxycholate Glucuronide as Surrogate Endogenous Probes for Drug Interaction Studies of OATP1B1 and OATP1B3 in Healthy Japanese Volunteers. *Pharm Res* **34**, 1601-1614, doi:10.1007/s11095-017-2184-5 (2017).
- 24 Thakare, R. *et al.* Leveraging of Rifampicin-Dosed Cynomolgus Monkeys to Identify Bile Acid 3-O-Sulfate Conjugates as Potential Novel Biomarkers for Organic Anion-Transporting Polypeptides. *Drug Metab Dispos* **45**, 721-733, doi:10.1124/dmd.117.075275 (2017).
- 25 Kamisako, T. *et al.* Transport of monoglucuronosyl and bisglucuronosyl bilirubin by recombinant human and rat multidrug resistance protein 2. *Hepatology* **30**, 485-490, doi:10.1002/hep.510300220 (1999).
- 26 Lee, Y. M. *et al.* Identification and functional characterization of the natural variant MRP3-Arg1297His of human multidrug resistance protein 3 (MRP3/MRP3). *Pharmacogenetics* **14**, 213-223 (2004).
- 27 Cheng, Y. *et al.* Biliary excretion of pravastatin and taurocholate in rats with bile salt export pump (Bsep) impairment. *Biopharm Drug Dispos* **37**, 276-286, doi:10.1002/bdd.2011 (2016).
- 28 Kis, E. *et al.* Effect of membrane cholesterol on BSEP/Bsep activity: species specificity studies for substrates and inhibitors. *Drug Metab Dispos* **37**, 1878-1886, doi:10.1124/dmd.108.024778 (2009).
- 29 Xiang, X., Backman, J. T., Neuvonen, P. J. & Niemi, M. Gender, but not CYP7A1 or SLCO1B1 polymorphism, affects the fasting plasma concentrations of bile acids in human beings. *Basic Clin Pharmacol Toxicol* **110**, 245-252, doi:10.1111/j.1742-7843.2011.00792.x (2012).
- 30 Xiang, X. *et al.* Effect of SLCO1B1 polymorphism on the plasma concentrations of bile acids and bile acid synthesis marker in humans. *Pharmacogenet Genomics* **19**, 447-457, doi:10.1097/FPC.0b013e32832bcf7b (2009).
- 31 Shen, H. *et al.* Cynomolgus monkey as a potential model to assess drug interactions involving hepatic organic anion transporting polypeptides: in vitro, in vivo, and in vitro-to-in vivo extrapolation. *J Pharmacol Exp Ther* **344**, 673-685, doi:10.1124/jpet.112.200691 (2013).
