# Supplementary material for: Organic Anion Transporter Polypeptide 1B1 Polymorphism Modulates the Extent of Drug–Drug Interaction and Associated Biomarker Levels in Healthy Volunteers
Source: PubMed Central journal article supplement — Clin Transl Sci. 2019 Apr 13;12(4):388–99. doi: 10.1111/cts.12625 (PMC6662551; doi:10.1111/cts.12625), 2019-04-13
Supplement: CTS-12-388-s004.pdf [file CTS-12-388-s004.pdf]

**Table S2.** Characteristics of healthy volunteers who participated in the pravastatin-cyclosporine (CSA) interaction study. All volunteers are self-reported Caucasians.

| <b>Characteristics</b>                                      | <b>Pravastatin-CSA study</b> | <b>Pravastatin-CSA biomarker study</b> |
|-------------------------------------------------------------|------------------------------|----------------------------------------|
| Male/Female (number)                                        | 11/9                         | 8/8                                    |
| Number of subjects in each genotype group (number of males) | 9 TT (5), 8 TC (5), 3 CC (1) | 8 TT (4), 6 TC (3), 2 CC (1)           |
| Body weight (kg) (mean $\pm$ SD)                            | 84 $\pm$ 20                  | 86 $\pm$ 21                            |
| Age (year $\pm$ SD)                                         | 32 $\pm$ 7                   | 33 $\pm$ 7                             |
