# Supplementary material for: Organic Anion Transporter Polypeptide 1B1 Polymorphism Modulates the Extent of Drug–Drug Interaction and Associated Biomarker Levels in Healthy Volunteers
Source: PubMed Central journal article supplement — Clin Transl Sci. 2019 Apr 13;12(4):388–99. doi: 10.1111/cts.12625 (PMC6662551; doi:10.1111/cts.12625), 2019-04-13
Supplement: CTS-12-388-s005.pdf [file CTS-12-388-s005.pdf]

**Table S3. Influence of cyclosporine and *SLCO1B1* c.521T>C genotype on the C<sub>max</sub> and AUC of pravastatin alone or pravastatin isomer (3'α-hydroxy pravastatin) alone in volunteers.** C<sub>max</sub> and AUC of pravastatin alone or its isomer alone when administered with placebo and cyclosporine are shown. Data are presented as mean ± standard deviation for each genotype group and all subjects combined. Paired t-test was used to determine the significance of C<sub>max</sub> and AUC between the treatment groups. The numbers in the parentheses represent the fold increase of (i) pravastatin plus the 3'α-hydroxy pravastatin; (ii) pravastatin only; and (iii) 3'α-hydroxy pravastatin levels, in pravastatin plus CSA group over pravastatin plus placebo. The significant p-values are: \*p<0.05; \*\*p<0.005; \*\*\* p<0.0005; \*\*\*\* p<0.0001.

|                                     | <b>(i) Pravastatin (Pravastatin plus 3'α-hydroxy pravastatin) (same information as Table 1)</b> |                 |                 |                 |                                   |                       |                         |                      |
|-------------------------------------|-------------------------------------------------------------------------------------------------|-----------------|-----------------|-----------------|-----------------------------------|-----------------------|-------------------------|----------------------|
| <b>Treatment</b>                    | <b>Pravastatin + Placebo</b>                                                                    |                 |                 |                 | <b>Pravastatin + Cyclosporine</b> |                       |                         |                      |
| <b>Genotype</b>                     | <b>All genotype</b>                                                                             | <b>TT (N=9)</b> | <b>TC (N=8)</b> | <b>CC (N=3)</b> | <b>All genotype</b>               | <b>TT (N=9)</b>       | <b>TC (N=8)</b>         | <b>CC (N=3)</b>      |
| <b>C<sub>max</sub> (ng/mL)</b>      | 106 ± 100                                                                                       | 98.78 ± 114     | 79.1 ± 50       | 201 ± 136       | 339 ± 266 ****<br>(4.3)           | 364 ± 360 *<br>(5.3)  | 266 ± 153 *<br>(3.9)    | 458 ± 166 *<br>(2.6) |
| <b>AUC<sub>last</sub> (ng*h/mL)</b> | 162 ± 129                                                                                       | 154.42 ± 153    | 124 ± 58        | 290 ± 148       | 554 ± 380 ****<br>(4.2)           | 572 ± 488 *<br>(5.0)  | 436 ± 198 **<br>(3.8)   | 818 ± 351<br>(3.1)   |
| <b>Treatment</b>                    | <b>(ii) Pravastatin only</b>                                                                    |                 |                 |                 |                                   |                       |                         |                      |
| <b>Genotype</b>                     | <b>All genotype</b>                                                                             | <b>TT (N=9)</b> | <b>TC (N=8)</b> | <b>CC (N=3)</b> | <b>All genotype</b>               | <b>TT (N=9)</b>       | <b>TC (N=8)</b>         | <b>CC (N=3)</b>      |
| <b>C<sub>max</sub> (ng/mL)</b>      | 39.2 ± 53.1*                                                                                    | 22.0 ± 9.30     | 31.4 ± 19.0     | 111 ± 126       | 122 ± 112 **<br>(4.8)             | 136 ± 158<br>(6.1)    | 99.5 ± 52.3 **<br>(4.2) | 143 ± 87.6<br>(2.2)  |
| <b>AUC<sub>last</sub> (ng*h/mL)</b> | 61.8 ± 64.6*                                                                                    | 43.3 ± 14.7     | 48.0 ± 23.2     | 154 ± 147       | 169 ± 126 **<br>(3.7)             | 187 ± 175 *<br>(4.3)  | 131 ± 57.9 **<br>(3.7)  | 212 ± 89.8<br>(2.1)  |
| <b>Treatment</b>                    | <b>(iii) 3'α-hydroxy pravastatin only</b>                                                       |                 |                 |                 |                                   |                       |                         |                      |
| <b>Genotype</b>                     | <b>All genotype</b>                                                                             | <b>TT (N=9)</b> | <b>TC (N=8)</b> | <b>CC (N=3)</b> | <b>All genotype</b>               | <b>TT (N=9)</b>       | <b>TC (N=8)</b>         | <b>CC (N=3)</b>      |
| <b>C<sub>max</sub> (ng/mL)</b>      | 67.4 ± 74.9                                                                                     | 77.2 ± 107      | 47.7 ± 34.8     | 90.6 ± 19.9     | 222 ± 184 ***<br>(5.7)            | 229 ± 225 *<br>(6.6)  | 169 ± 127 *<br>(5.4)    | 338 ± 180<br>(3.5)   |
| <b>AUC<sub>last</sub> (ng*h/mL)</b> | 101 ± 101                                                                                       | 111 ± 145       | 75.3 ± 43.4     | 138 ± 25.3      | 385 ± 303 ****<br>(6.2)           | 384 ± 354 **<br>(7.3) | 303 ± 186 **<br>(5.6)   | 605 ± 384<br>(4.2)   |

C<sub>max</sub>; C<sub>max</sub>: observed peak plasma concentration; AUC<sub>last</sub>: area under the curve from time zero to the last quantifiable concentration (12 hour).
