# Supplementary material for: Organic Anion Transporter Polypeptide 1B1 Polymorphism Modulates the Extent of Drug–Drug Interaction and Associated Biomarker Levels in Healthy Volunteers
Source: PubMed Central journal article supplement — Clin Transl Sci. 2019 Apr 13;12(4):388–99. doi: 10.1111/cts.12625 (PMC6662551; doi:10.1111/cts.12625), 2019-04-13
Supplement: CTS-12-388-s006.pdf [file CTS-12-388-s006.pdf]

**Table S4.** Pearson correlation, r, between pravastatin AUC with each of the biomarkers after administration with CSA. Figure 4 showed the correlation between pravastatin and each of the biomarkers.

| <b>(i) Including all genotype group of SLCO1B1 c.521T&gt;C</b>                   |                      |                        |                       |                      |
|----------------------------------------------------------------------------------|----------------------|------------------------|-----------------------|----------------------|
| <b>AUC<sub>last</sub> (N=32)</b>                                                 | <b>HDA</b>           | <b>TDA</b>             | <b>CP-I</b>           | <b>CP-III</b>        |
| Pearson, r (95% CI)                                                              | 0.50 (0.18 to 0.72)  | 0.52 (0.21 to 0.73)    | 0.39 (0.047 to 0.65)  | 0.41 (0.070 to 0.66) |
| P-value                                                                          | 0.0038               | 0.0024                 | 0.028                 | 0.020                |
|                                                                                  |                      |                        |                       |                      |
| <b>C<sub>max</sub> (N=32)</b>                                                    | <b>HDA</b>           | <b>TDA</b>             | <b>CP-I</b>           | <b>CP-III</b>        |
| Pearson, r (95% CI)                                                              | 0.37 (0.020 to 0.63) | 0.35 (0.00024 to 0.62) | 0.16 (-0.20 to 0.48)  | 0.49 (0.17 to 0.72)  |
| P-value                                                                          | 0.039                | 0.050                  | 0.38                  | 0.0043               |
|                                                                                  |                      |                        |                       |                      |
| <b>(ii) Including individual with TT and TC genotype for SLCO1B1 c.521T&gt;C</b> |                      |                        |                       |                      |
| <b>AUC<sub>last</sub> (N=28)</b>                                                 | <b>HDA</b>           | <b>TDA</b>             | <b>CP-I</b>           | <b>CP-III</b>        |
| Pearson, r (95% CI)                                                              | 0.56 (0.23 to 0.77)  | 0.75 (0.53 to 0.88)    | 0.32 (-0.064 to 0.62) | 0.38 (0.014 to 0.66) |
| P-value                                                                          | 0.0021               | <0.0001                | 0.10                  | 0.043                |
|                                                                                  |                      |                        |                       |                      |
| <b>C<sub>max</sub> (N=28)</b>                                                    | <b>HDA</b>           | <b>TDA</b>             | <b>CP-I</b>           | <b>CP-III</b>        |
| Pearson, r (95% CI)                                                              | 0.49 (0.14 to 0.73)  | 0.66 (0.37 to 0.83)    | 0.17 (-0.21 to 0.51)  | 0.48 (0.12 to 0.72)  |
| P-value                                                                          | 0.0084               | 0.0002                 | 0.37                  | 0.011                |
