# Supplementary material for: Organic Anion Transporter Polypeptide 1B1 Polymorphism Modulates the Extent of Drug–Drug Interaction and Associated Biomarker Levels in Healthy Volunteers
Source: PubMed Central journal article supplement — Clin Transl Sci. 2019 Apr 13;12(4):388–99. doi: 10.1111/cts.12625 (PMC6662551; doi:10.1111/cts.12625), 2019-04-13
Supplement: CTS-12-388-s007.pdf [file CTS-12-388-s007.pdf]

**Table S5.** Overall summary of previous and current studies comparing the effect of *SLCO1B1* genotype on drug levels and its effect by OATP1B1 inhibition.

| Study                                | Victim (OATP1B1 substrate) | Perpetrator (OATP1B1 inhibitor) | Average fold increased of AUC (comparing c.521CC and c.521TT) | Average fold increased of AUC by perpetrator (range for the different genotype group, TT, TC, CC) | Overall impact of <i>SLCO1B1</i> c.521T>C on OATP1B1 mediated interactions                 |
|--------------------------------------|----------------------------|---------------------------------|---------------------------------------------------------------|---------------------------------------------------------------------------------------------------|--------------------------------------------------------------------------------------------|
| Kalliokoski et al. 2008 <sup>1</sup> | Repaglinide (0.25 mg)      | Gemfibrozil (1200 mg)           | 1.7 fold increase                                             | 7.3-8.2 fold                                                                                      | Fold increased slightly reduced in subjects with c.521T>C                                  |
| He et al. 2009 <sup>2</sup>          | Atorvastatin (40 mg)       | Rifampicin (600 mg)             | 2.2 fold                                                      | 4.6-8.6 fold                                                                                      | Fold increased reduced in subjects with c.521T>C                                           |
| This study                           | Pravastatin (40 mg)        | Cyclosporin                     | 1.9 fold increase                                             | 3.1–5.0 fold increase                                                                             | Fold increased reduced in subjects with c.521T>C                                           |
|                                      | HDA                        | Cyclosporin                     | 2.6 fold increase                                             | 1.2–2.0 fold increase                                                                             | Fold increased reduced in subjects with c.521T>C and no increased in subjects with c.521CC |
|                                      | TDA                        | Cyclosporin                     | 4 fold increase                                               | 0.9–2.2 fold increase                                                                             | Fold increased reduced in subjects with c.521T>C and no increased in subjects with c.521CC |
|                                      | CP-I                       | Cyclosporin                     | 2.6 fold increase                                             | 1.5–1.7 fold increase                                                                             | Fold increased slightly reduced in subjects with c.521CC                                   |
|                                      | CP-III                     | Cyclosporin                     | 1.4 fold increase                                             | 1.2–1.3 fold increase                                                                             | Fold increased slightly reduced in subjects with c.521CC                                   |

## References

1. Kalliokoski, A., Backman, J.T., Kurkinen, K.J., Neuvonen, P.J. & Niemi, M. Effects of gemfibrozil and atorvastatin on the pharmacokinetics of repaglinide in relation to *SLCO1B1* polymorphism. *Clin Pharmacol Ther* **84**, 488-96 (2008).
2. He, Y.J. et al. Rifampicin alters atorvastatin plasma concentration on the basis of *SLCO1B1* 521T>C polymorphism. *Clin Chim Acta* **405**, 49-52 (2009).
